# Supplementary material for: Modeling how substitution of sedentary behavior with standing or physical activity is associated with health-related quality of life in colorectal cancer survivors
Source: Cancer Causes Control. 2016 Feb 18;27:513–25. doi: 10.1007/s10552-016-0725-6 (PMC4796364; doi:10.1007/s10552-016-0725-6)
Supplement: Supplementary file 2 — Supplementary material 2 (PDF 142 kb) [file 10552_2016_725_MOESM2_ESM.pdf]

**Modeling how substitution of sedentary behavior with standing or physical activity is associated with health-related quality of life in colorectal cancer survivors**

Eline H. van Roekel, Martijn J.L. Bours, José J.L. Breedveld-Peters, Paul J.B. Willems, Kenneth Meijer, IJmert Kant, Piet A. van den Brandt, Geerard L. Beets, Silvia Sanduleanu, and Matty P. Weijenberg

**Corresponding author:** Eline H. van Roekel, Maastricht University, Department of Epidemiology, GROW School for Oncology and Developmental Biology, P.O. Box 616, 6200 MD Maastricht, The Netherlands. Phone: +31 43 38 83428. Fax: +31 43 38 84128. E-mail: [eline.vanroekel@maastrichtuniversity.nl](mailto:eline.vanroekel@maastrichtuniversity.nl).

*Cancer Causes & Control*

**Supplementary Table 1.** Calculated cutoffs for regression coefficients from isotemporal substitution models reported within this article being described as “meaningful”, based on minimally important differences in health-related quality of life outcomes<sup>a</sup>

| Health-related quality of life outcomes <sup>b</sup> | Cutoff for substituting sedentary time with standing or physical activity | Cutoff for substituting standing time with physical activity |
|------------------------------------------------------|---------------------------------------------------------------------------|--------------------------------------------------------------|
| Global quality of life                               | 2.9                                                                       | 3.8                                                          |
| Physical functioning                                 | 4.1                                                                       | 5.4                                                          |
| Role functioning                                     | 5.6                                                                       | 7.3                                                          |
| Social functioning                                   | 3.2                                                                       | 4.2                                                          |
| Disability                                           | 2.3                                                                       | 3.0                                                          |
| Fatigue                                              | 4.0                                                                       | 5.2                                                          |
| Depression                                           | 0.5                                                                       | 0.7                                                          |
| Anxiety                                              | 0.5                                                                       | 0.7                                                          |

<sup>a</sup>Calculation based on definition that regression coefficients from isotemporal substitution models presented in this article were described as “meaningful” if the mean difference in health-related quality of life outcome associated with a difference of 2 standard deviations (SDs) of the substituted activity variable (i.e., sedentary [SD, 1.7 hours/day] or standing [SD, 1.3 hours/day] time) with time in another activity variable (i.e., standing or physical activity) exceeded the minimally important difference cutoff for a medium effect size (according to published guidelines for medium cross-sectional differences in the EORTC QLQ-C30 subscales global health status/quality of life [10], physical functioning [14], role functioning [19], social functioning [11]; or 0.5 times the SD of the outcome score for disability [7.8], fatigue [13.6], depression [1.7], and anxiety [1.8] for which no guidelines are available).

<sup>b</sup>Scales are 0-100 (global quality of life, physical, role and social functioning, and disability), 20-140 (fatigue), and 0-21 (depression and anxiety), with higher scores indicating higher global quality of life, physical, role and social functioning, disability, fatigue, depression and anxiety.

**Supplementary Table 2.** Analyses of isotemporal substitution models<sup>a</sup> for analyzing associations of substituting sedentary time by standing or physical activity, and for substituting standing time with physical activity, with health-related quality of life scores<sup>b</sup> in colorectal cancer survivors in confounder-adjusted linear regression models<sup>c</sup>

| Health-related quality of life outcomes | Substituting 1 hour/day of sedentary time with standing |            | Substituting 1 hour/day of sedentary time with physical activity |            | Substituting 1 hour/day of standing time with physical activity |           |
|-----------------------------------------|---------------------------------------------------------|------------|------------------------------------------------------------------|------------|-----------------------------------------------------------------|-----------|
|                                         | $\beta$                                                 | 95% CI     | $\beta$                                                          | 95% CI     | $\beta$                                                         | 95% CI    |
| Global quality of life ( $n = 136$ )    | 1.0                                                     | -1.6, 3.5  | 3.2                                                              | -1.6, 7.9  | 2.2                                                             | -3.9, 8.4 |
| Physical functioning ( $n = 136$ )      | 3.1                                                     | 0.5, 5.7   | 5.6                                                              | 0.7, 10.6  | 2.6                                                             | -3.9, 9.0 |
| Role functioning ( $n = 136$ )          | 3.1                                                     | -0.4, 6.6  | 1.7                                                              | -4.9, 8.3  | -1.4                                                            | -9.9, 7.2 |
| Social functioning ( $n = 136$ )        | 1.3                                                     | -1.4, 3.9  | 0.4                                                              | -4.6, 5.4  | -0.8                                                            | -7.3, 5.7 |
| Disability ( $n = 132$ )                | -3.0                                                    | -4.9, -1.1 | -3.3                                                             | -6.9, 0.3  | -0.4                                                            | -5.0, 4.3 |
| Fatigue ( $n = 134$ )                   | -4.0                                                    | -7.6, -0.3 | -3.6                                                             | -10.5, 3.3 | 0.3                                                             | -8.5, 9.2 |
| Depression ( $n = 135$ )                | -0.1                                                    | -0.5, 0.4  | -0.5                                                             | -1.4, 0.4  | -0.4                                                            | -1.6, 0.7 |
| Anxiety ( $n = 135$ )                   | 0.0                                                     | -0.5, 0.5  | -0.7                                                             | -1.7, 0.3  | -0.7                                                            | -2.0, 0.5 |

Abbreviations:  $\beta$ , unstandardized regression coefficient (representing the difference in mean health-related quality of life score per substitution of 1 hour/day of sedentary or standing time with standing or physical activity, while keeping total time constant); CI, confidence interval.

<sup>a</sup>All activity categories except for the category to be substituted (i.e., sedentary or standing time), and total waking wear time were entered in a single model, to estimate associations of substituting 1 hour/day of sedentary or standing time (the excluded variable) with standing or physical activity, while keeping total time constant.

<sup>b</sup>Scales are 0-100 (global quality of life, physical, role and social functioning, and disability), 20-140 (fatigue), and 0-21 (depression and anxiety), with higher scores indicating higher global quality of life, physical, role and social functioning, disability, fatigue, depression and anxiety.

<sup>c</sup>Models were adjusted for age (years), gender, number of comorbidities (0/1/ $\geq 2$ ), smoking status (current/previous or never), time since diagnosis (years), cancer stage (I/II/III), body mass index (kg/m<sup>2</sup>), perceived deficiency in social support score (continuous), chemotherapy received (yes/no; only models with physical functioning, fatigue and depression as outcome), stoma (yes/no; only models with physical and role functioning, disability and anxiety as outcome), tumor subsite (colon/rectum, with rectosigmoid classified as rectum; only models with physical and role functioning, and disability as outcome), education level (low/medium/high; only models with fatigue and depression as outcome), having a partner (yes/no; only models with anxiety as outcome).

**Supplementary Table 3.** Results of logistic isotemporal substitution models with dichotomized health-related quality of life scores<sup>a</sup> in colorectal cancer survivors<sup>b</sup>

| Health-related<br>quality of life outcomes | Substituting 1 hour/day<br>of sedentary with<br>standing |          | Substituting 1 hour/day<br>of sedentary with<br>physical activity |          | Substituting 1 hour/day<br>of standing with physical<br>activity |          |
|--------------------------------------------|----------------------------------------------------------|----------|-------------------------------------------------------------------|----------|------------------------------------------------------------------|----------|
|                                            | OR                                                       | 95% CI   | OR                                                                | 95% CI   | OR                                                               | 95% CI   |
| Global quality of life ( <i>n</i> = 136)   | 1.0                                                      | 0.7, 1.5 | 1.2                                                               | 0.6, 2.5 | 1.2                                                              | 0.5, 3.1 |
| Physical functioning ( <i>n</i> = 136)     | 1.1                                                      | 0.7, 1.7 | 1.7                                                               | 0.8, 3.7 | 1.5                                                              | 0.5, 4.3 |
| Role functioning ( <i>n</i> = 136)         | 1.2                                                      | 0.8, 1.8 | 0.7                                                               | 0.3, 1.5 | 0.6                                                              | 0.2, 1.6 |
| Social functioning ( <i>n</i> = 136)       | 1.2                                                      | 0.8, 1.8 | 0.6                                                               | 0.3, 1.3 | 0.5                                                              | 0.2, 1.4 |
| Disability ( <i>n</i> = 132)               | 0.6                                                      | 0.4, 0.9 | 0.9                                                               | 0.4, 1.9 | 1.6                                                              | 0.6, 4.2 |
| Fatigue ( <i>n</i> = 134)                  | 1.0                                                      | 0.6, 1.4 | 0.6                                                               | 0.3, 1.3 | 0.7                                                              | 0.3, 1.7 |
| Depression ( <i>n</i> = 135)               | 1.1                                                      | 0.7, 1.6 | 0.8                                                               | 0.4, 1.6 | 0.8                                                              | 0.3, 1.9 |
| Anxiety ( <i>n</i> = 135)                  | 1.1                                                      | 0.7, 1.5 | 0.7                                                               | 0.4, 1.5 | 0.7                                                              | 0.3, 1.7 |

Abbreviations: CI, confidence interval; OR, odds ratio.

<sup>a</sup>Scales are 0-100 (global quality of life, physical, role and social functioning, and disability), 20-140 (fatigue), and 0-21 (depression and anxiety), with higher scores indicating higher global quality of life, physical, role and social functioning, disability, fatigue, depression and anxiety; dichotomized with gender-specific medians as cutoff values for global quality of life (men:  $\geq 83.3$  vs  $< 83.3$ ; women:  $\geq 83.3$  vs  $< 83.3$ ), physical functioning (men:  $\geq 93.3$  vs  $< 93.3$ ; women:  $\geq 80.0$  vs  $< 80.0$ ), role functioning (men: 100.0 vs  $< 100.0$ ; women: 100.0 vs  $< 100.0$ ) and social functioning (men: 100.0 vs  $< 100.0$ ; women: 100.0 vs  $< 100.0$ ), disability (men:  $\geq 5.6$  vs  $< 5.6$ ; women:  $\geq 11.1$  vs  $< 11.1$ ), fatigue (men:  $\geq 54.0$  vs  $< 54.0$ ; women:  $\geq 50.0$  vs  $< 50.0$ ), depression (men:  $\geq 4.0$  vs  $< 4.0$ ; women:  $\geq 4.0$  vs  $< 4.0$ ), and anxiety (men:  $\geq 4.0$  vs  $< 4.0$ ; women:  $\geq 5.0$  vs  $< 5.0$ ); with odds ratios for high vs low levels of quality of life, physical, role and social functioning, and disability, fatigue, depression, and anxiety.

<sup>b</sup>All activity categories except for the category to be substituted (i.e., sedentary or standing time), and total waking wear time were entered in a single model, to estimate associations of substituting 1 hour/day of sedentary or standing time (the excluded variable) with standing or physical activity, while keeping total time constant. Models were adjusted for age (years), gender, number of comorbidities (0/1/ $\geq 2$ ), smoking status (current/previous or never), time since diagnosis (years), cancer stage (I/II/III), body mass index ( $\text{kg}/\text{m}^2$ ), perceived deficiency in social support score (continuous), chemotherapy received (yes/no; only models with physical functioning, fatigue and depression as outcome), stoma (yes/no; only models with physical and role functioning, disability and anxiety as outcome), tumor subsite (colon/rectum, with rectosigmoid classified as rectum; only models with physical and role functioning, and disability as outcome), education level (low/medium/high; only models with fatigue and depression as outcome), having a partner (yes/no; only models with anxiety as outcome).

**Supplementary Table 4.** Results of subgroup analyses for associations of substituting sedentary time by standing or physical activity, and for substituting standing time with physical activity, with health-related quality of life scores<sup>a</sup> in colorectal cancer survivors in isotemporal substitution linear regression models<sup>b</sup> stratified for gender, age, number of comorbidities, body mass index and perceived deficiency in social support

|                                   | Substituting<br>1 hour/day of sedentary<br>time with standing |            | Substituting<br>1 hour/day of sedentary<br>time with physical<br>activity |             | Substituting<br>1 hour/day of standing<br>time with physical<br>activity |             |
|-----------------------------------|---------------------------------------------------------------|------------|---------------------------------------------------------------------------|-------------|--------------------------------------------------------------------------|-------------|
|                                   | $\beta$                                                       | 95% CI     | $\beta$                                                                   | 95% CI      | $\beta$                                                                  | 95% CI      |
| <b>Gender</b>                     |                                                               |            |                                                                           |             |                                                                          |             |
| Global quality of life            |                                                               |            |                                                                           |             |                                                                          |             |
| Total group ( <i>n</i> = 136)     | 1.0                                                           | -1.6, 3.5  | 3.2                                                                       | -1.6, 7.9   | 2.2                                                                      | -3.9, 8.4   |
| Men ( <i>n</i> = 82)              | -0.8                                                          | -4.1, 2.4  | 2.2                                                                       | -3.8, 8.3   | 3.1                                                                      | -5.0, 11.2  |
| Women ( <i>n</i> = 54)            | 2.4                                                           | -1.8, 6.6  | 3.7                                                                       | -4.2, 11.7  | 1.3                                                                      | -8.8, 11.5  |
| Physical functioning              |                                                               |            |                                                                           |             |                                                                          |             |
| Total group ( <i>n</i> = 136)     | 3.1                                                           | 0.5, 5.7   | 5.6                                                                       | 0.7, 10.6   | 2.6                                                                      | -3.9, 9.0   |
| Men ( <i>n</i> = 82)              | 1.3                                                           | -2.2, 4.7  | 0.3                                                                       | -6.2, 6.9   | -0.9                                                                     | -9.6, 7.7   |
| Women ( <i>n</i> = 54)            | 5.2                                                           | 1.1, 9.3   | 9.8                                                                       | 2.0, 17.5   | 4.5                                                                      | -5.5, 14.5  |
| Role functioning                  |                                                               |            |                                                                           |             |                                                                          |             |
| Total group ( <i>n</i> = 136)     | 3.1                                                           | -0.4, 6.6  | 1.7                                                                       | -4.9, 8.3   | -1.4                                                                     | -9.9, 7.2   |
| Men ( <i>n</i> = 82)              | -1.2                                                          | -5.7, 3.3  | 2.1                                                                       | -6.3, 10.5  | 3.3                                                                      | -7.9, 14.5  |
| Women ( <i>n</i> = 54)            | 5.7                                                           | -0.4, 11.7 | 3.6                                                                       | -7.7, 15.0  | -2.0                                                                     | -16.7, 12.6 |
| Social functioning                |                                                               |            |                                                                           |             |                                                                          |             |
| Total group ( <i>n</i> = 136)     | 1.3                                                           | -1.4, 3.9  | 0.4                                                                       | -4.6, 5.4   | -0.8                                                                     | -7.3, 5.7   |
| Men ( <i>n</i> = 82)              | 0.3                                                           | -4.4, 5.1  | 3.1                                                                       | -5.7, 11.9  | 2.7                                                                      | -9.0, 14.5  |
| Women ( <i>n</i> = 54)            | 1.3                                                           | -1.3, 3.9  | -1.5                                                                      | -6.3, 3.4   | -2.8                                                                     | -9.0, 3.4   |
| Disability                        |                                                               |            |                                                                           |             |                                                                          |             |
| Total group ( <i>n</i> = 132)     | -3.0                                                          | -4.9, -1.1 | -3.3                                                                      | -6.9, 0.3   | -0.4                                                                     | -5.0, 4.3   |
| Men ( <i>n</i> = 81)              | -2.2                                                          | -4.7, 0.4  | -0.3                                                                      | -5.0, 4.4   | 1.8                                                                      | -4.4, 8.0   |
| Women ( <i>n</i> = 51)            | -3.0                                                          | -6.1, 0.1  | -7.2                                                                      | -12.9, -1.4 | -4.2                                                                     | -11.6, 3.3  |
| Fatigue                           |                                                               |            |                                                                           |             |                                                                          |             |
| Total group ( <i>n</i> = 134)     | -4.0                                                          | -7.6, -0.3 | -3.6                                                                      | -10.5, 3.3  | 0.3                                                                      | -8.5, 9.2   |
| Men ( <i>n</i> = 82)              | 0.2                                                           | -4.9, 5.4  | -4.2                                                                      | -13.7, 5.3  | -4.4                                                                     | -16.9, 8.1  |
| Women ( <i>n</i> = 52)            | -5.7                                                          | -11.9, 0.6 | -3.1                                                                      | -14.1, 7.8  | 2.6                                                                      | -11.5, 16.7 |
| Depression                        |                                                               |            |                                                                           |             |                                                                          |             |
| Total group ( <i>n</i> = 135)     | -0.1                                                          | -0.5, 0.4  | -0.5                                                                      | -1.4, 0.4   | -0.4                                                                     | -1.6, 0.7   |
| Men ( <i>n</i> = 81)              | 0.1                                                           | -0.6, 0.8  | 0.4                                                                       | -1.0, 1.7   | 0.3                                                                      | -1.5, 2.0   |
| Women ( <i>n</i> = 54)            | 0.2                                                           | -0.4, 0.8  | -1.0                                                                      | -2.0, 0.1   | -1.2                                                                     | -2.6, 0.2   |
| Anxiety                           |                                                               |            |                                                                           |             |                                                                          |             |
| Total group ( <i>n</i> = 135)     | 0.0                                                           | -0.5, 0.5  | -0.7                                                                      | -1.7, 0.3   | -0.7                                                                     | -2.0, 0.5   |
| Men ( <i>n</i> = 81)              | -0.2                                                          | -1.0, 0.6  | 0.0                                                                       | -1.5, 1.4   | 0.1                                                                      | -1.8, 2.1   |
| Women ( <i>n</i> = 54)            | 0.2                                                           | -0.5, 0.9  | -1.0                                                                      | -2.4, 0.4   | -1.2                                                                     | -3.0, 0.6   |
| <b>Age</b>                        |                                                               |            |                                                                           |             |                                                                          |             |
| Global quality of life            |                                                               |            |                                                                           |             |                                                                          |             |
| Total group ( <i>n</i> = 136)     | 1.0                                                           | -1.6, 3.5  | 3.2                                                                       | -1.6, 7.9   | 2.2                                                                      | -3.9, 8.4   |
| <70 years of age ( <i>n</i> = 68) | -0.2                                                          | -3.8, 3.5  | 3.3                                                                       | -3.4, 10.0  | 3.5                                                                      | -5.7, 12.6  |
| ≥70 years of age ( <i>n</i> = 68) | 2.5                                                           | -1.5, 6.6  | 3.9                                                                       | -4.4, 12.2  | 1.3                                                                      | -8.8, 11.4  |
| Physical functioning              |                                                               |            |                                                                           |             |                                                                          |             |
| Total group ( <i>n</i> = 136)     | 3.1                                                           | 0.5, 5.7   | 5.6                                                                       | 0.7, 10.6   | 2.6                                                                      | -3.9, 9.0   |
| <70 years of age ( <i>n</i> = 68) | 6.2                                                           | 2.3, 10.0  | 1.5                                                                       | -5.4, 8.4   | -4.6                                                                     | -14.1, 4.9  |
| ≥70 years of age ( <i>n</i> = 68) | 1.4                                                           | -2.6, 5.3  | 6.8                                                                       | -1.6, 15.3  | 5.5                                                                      | -4.8, 15.7  |
| Role functioning                  |                                                               |            |                                                                           |             |                                                                          |             |
| Total group ( <i>n</i> = 136)     | 3.1                                                           | -0.4, 6.6  | 1.7                                                                       | -4.9, 8.3   | -1.4                                                                     | -9.9, 7.2   |
| <70 years of age ( <i>n</i> = 68) | 3.9                                                           | -1.3, 9.2  | 1.8                                                                       | -7.6, 11.2  | -2.1                                                                     | -15.1, 10.8 |
| ≥70 years of age ( <i>n</i> = 68) | 2.7                                                           | -2.8, 8.1  | -0.2                                                                      | -11.7, 11.3 | -2.9                                                                     | -17.0, 11.2 |
| Social functioning                |                                                               |            |                                                                           |             |                                                                          |             |
| Total group ( <i>n</i> = 136)     | 1.3                                                           | -1.4, 3.9  | 0.4                                                                       | -4.6, 5.4   | -0.8                                                                     | -7.3, 5.7   |
| <70 years of age ( <i>n</i> = 68) | 1.0                                                           | -2.6, 4.5  | -1.0                                                                      | -7.5, 5.5   | -2.0                                                                     | -10.8, 6.9  |
| ≥70 years of age ( <i>n</i> = 68) | 0.4                                                           | -4.0, 4.7  | 2.6                                                                       | -6.2, 11.4  | 2.2                                                                      | -8.5, 12.9  |

(Table continues on next page)

|                                              | Substituting<br>1 hour/day of sedentary<br>time with standing |             | Substituting<br>1 hour/day of sedentary<br>time with physical<br>activity |            | Substituting<br>1 hour/day of standing<br>time with physical<br>activity |             |
|----------------------------------------------|---------------------------------------------------------------|-------------|---------------------------------------------------------------------------|------------|--------------------------------------------------------------------------|-------------|
|                                              | $\beta$                                                       | 95% CI      | $\beta$                                                                   | 95% CI     | $\beta$                                                                  | 95% CI      |
| Disability                                   |                                                               |             |                                                                           |            |                                                                          |             |
| Total group ( $n = 132$ )                    | -3.0                                                          | -4.9, -1.1  | -3.3                                                                      | -6.9, 0.3  | -0.4                                                                     | -5.0, 4.3   |
| <70 years of age ( $n = 68$ )                | -4.2                                                          | -7.0, -1.4  | -2.1                                                                      | -7.1, 2.9  | 2.1                                                                      | -4.9, 9.0   |
| $\geq 70$ years of age ( $n = 64$ )          | -2.0                                                          | -5.0, 1.0   | -2.5                                                                      | -8.8, 3.9  | -0.5                                                                     | -8.3, 7.4   |
| Fatigue                                      |                                                               |             |                                                                           |            |                                                                          |             |
| Total group ( $n = 134$ )                    | -4.0                                                          | -7.6, -0.3  | -3.6                                                                      | -10.5, 3.3 | 0.3                                                                      | -8.5, 9.2   |
| <70 years of age ( $n = 66$ )                | -3.1                                                          | -9.2, 3.0   | -5.5                                                                      | -16.3, 5.3 | -2.4                                                                     | -17.2, 12.3 |
| $\geq 70$ years of age ( $n = 68$ )          | -5.3                                                          | -10.6, -0.0 | -1.5                                                                      | -12.4, 9.3 | 3.8                                                                      | -9.3, 16.9  |
| Depression                                   |                                                               |             |                                                                           |            |                                                                          |             |
| Total group ( $n = 135$ )                    | -0.1                                                          | -0.5, 0.4   | -0.5                                                                      | -1.4, 0.4  | -0.4                                                                     | -1.6, 0.7   |
| <70 years of age ( $n = 68$ )                | -0.1                                                          | -0.8, 0.6   | -0.7                                                                      | -2.0, 0.6  | -0.6                                                                     | -2.4, 1.2   |
| $\geq 70$ years of age ( $n = 67$ )          | -0.1                                                          | -0.8, 0.7   | -0.3                                                                      | -1.9, 1.3  | -0.2                                                                     | -2.1, 1.7   |
| Anxiety                                      |                                                               |             |                                                                           |            |                                                                          |             |
| Total group ( $n = 135$ )                    | 0.0                                                           | -0.5, 0.5   | -0.7                                                                      | -1.7, 0.3  | -0.7                                                                     | -2.0, 0.5   |
| <70 years of age ( $n = 68$ )                | -0.1                                                          | -0.8, 0.6   | -0.6                                                                      | -1.9, 0.7  | -0.5                                                                     | -2.3, 1.3   |
| $\geq 70$ years of age ( $n = 67$ )          | 0.0                                                           | -0.8, 0.8   | -0.9                                                                      | -2.6, 0.9  | -0.9                                                                     | -3.0, 1.2   |
| <b>Number of comorbidities</b>               |                                                               |             |                                                                           |            |                                                                          |             |
| Global quality of life                       |                                                               |             |                                                                           |            |                                                                          |             |
| Total group ( $n = 136$ )                    | 1.0                                                           | -1.6, 3.5   | 3.2                                                                       | -1.6, 7.9  | 2.2                                                                      | -3.9, 8.4   |
| <2 comorbidities ( $n = 64$ )                | 0.1                                                           | -3.0, 3.2   | 4.3                                                                       | -0.9, 9.5  | 4.2                                                                      | -2.9, 11.2  |
| $\geq 2$ comorbidities ( $n = 72$ )          | 1.6                                                           | -2.6, 5.7   | 2.0                                                                       | -7.1, 11.0 | 0.4                                                                      | -10.8, 11.6 |
| Physical functioning                         |                                                               |             |                                                                           |            |                                                                          |             |
| Total group ( $n = 136$ )                    | 3.1                                                           | 0.5, 5.7    | 5.6                                                                       | 0.7, 10.6  | 2.6                                                                      | -3.9, 9.0   |
| <2 comorbidities ( $n = 64$ )                | 3.0                                                           | -0.9, 6.9   | 4.1                                                                       | -2.4, 10.5 | 1.1                                                                      | -7.7, 9.9   |
| $\geq 2$ comorbidities ( $n = 72$ )          | 2.5                                                           | -1.2, 6.2   | 5.1                                                                       | -3.9, 14.1 | 2.6                                                                      | -8.1, 13.3  |
| Role functioning                             |                                                               |             |                                                                           |            |                                                                          |             |
| Total group ( $n = 136$ )                    | 3.1                                                           | -0.4, 6.6   | 1.7                                                                       | -4.9, 8.3  | -1.4                                                                     | -9.9, 7.2   |
| <2 comorbidities ( $n = 64$ )                | 3.4                                                           | -1.0, 7.8   | 4.1                                                                       | -3.2, 11.3 | 0.7                                                                      | -9.2, 10.6  |
| $\geq 2$ comorbidities ( $n = 72$ )          | 2.9                                                           | -2.5, 8.4   | -7.9                                                                      | -20.7, 4.8 | -10.9                                                                    | -26.1, 4.4  |
| Social functioning                           |                                                               |             |                                                                           |            |                                                                          |             |
| Total group ( $n = 136$ )                    | 1.3                                                           | -1.4, 3.9   | 0.4                                                                       | -4.6, 5.4  | -0.8                                                                     | -7.3, 5.7   |
| <2 comorbidities ( $n = 64$ )                | 1.4                                                           | -1.2, 3.9   | -1.0                                                                      | -5.3, 3.2  | -2.4                                                                     | -8.2, 3.3   |
| $\geq 2$ comorbidities ( $n = 72$ )          | 2.0                                                           | -2.5, 6.5   | 0.8                                                                       | -8.9, 10.4 | -1.2                                                                     | -13.3, 10.8 |
| Disability                                   |                                                               |             |                                                                           |            |                                                                          |             |
| Total group ( $n = 132$ )                    | -3.0                                                          | -4.9, -1.1  | -3.3                                                                      | -6.9, 0.3  | -0.4                                                                     | -5.0, 4.3   |
| <2 comorbidities ( $n = 64$ )                | -2.9                                                          | -5.3, -0.5  | -2.4                                                                      | -6.4, 1.5  | 0.5                                                                      | -4.9, 5.9   |
| $\geq 2$ comorbidities ( $n = 68$ )          | -3.3                                                          | -6.4, -0.3  | -2.2                                                                      | -9.2, 4.8  | 1.2                                                                      | -7.3, 9.7   |
| Fatigue                                      |                                                               |             |                                                                           |            |                                                                          |             |
| Total group ( $n = 134$ )                    | -4.0                                                          | -7.6, -0.3  | -3.6                                                                      | -10.5, 3.3 | 0.3                                                                      | -8.5, 9.2   |
| <2 comorbidities ( $n = 64$ )                | -1.7                                                          | -7.2, 3.8   | -3.8                                                                      | -13.2, 5.5 | -2.1                                                                     | -14.7, 10.5 |
| $\geq 2$ comorbidities ( $n = 70$ )          | -5.3                                                          | -11.1, 0.4  | -3.7                                                                      | -15.7, 8.3 | 1.7                                                                      | -13.2, 16.5 |
| Depression                                   |                                                               |             |                                                                           |            |                                                                          |             |
| Total group ( $n = 135$ )                    | -0.1                                                          | -0.5, 0.4   | -0.5                                                                      | -1.4, 0.4  | -0.4                                                                     | -1.6, 0.7   |
| <2 comorbidities ( $n = 63$ )                | 0.1                                                           | -0.6, 0.8   | -0.3                                                                      | -1.5, 0.9  | -0.4                                                                     | -2.1, 1.2   |
| $\geq 2$ comorbidities ( $n = 72$ )          | -0.1                                                          | -0.8, 0.7   | -1.1                                                                      | -2.6, 0.5  | -1.0                                                                     | -2.9, 0.9   |
| Anxiety                                      |                                                               |             |                                                                           |            |                                                                          |             |
| Total group ( $n = 135$ )                    | 0.0                                                           | -0.5, 0.5   | -0.7                                                                      | -1.7, 0.3  | -0.7                                                                     | -2.0, 0.5   |
| <2 comorbidities ( $n = 64$ )                | 0.6                                                           | -0.1, 1.4   | -0.9                                                                      | -2.1, 0.4  | -1.5                                                                     | -3.2, 0.2   |
| $\geq 2$ comorbidities ( $n = 71$ )          | -0.5                                                          | -1.1, 0.2   | 0.3                                                                       | -1.2, 1.8  | 0.8                                                                      | -1.0, 2.6   |
| <b>Body mass index</b>                       |                                                               |             |                                                                           |            |                                                                          |             |
| Global quality of life                       |                                                               |             |                                                                           |            |                                                                          |             |
| Total group ( $n = 136$ )                    | 1.0                                                           | -1.6, 3.5   | 3.2                                                                       | -1.6, 7.9  | 2.2                                                                      | -3.9, 8.4   |
| BMI <30 kg/m <sup>2</sup> ( $n = 98$ )       | 0.2                                                           | -2.4, 2.8   | 6.5                                                                       | 1.2, 11.8  | 6.3                                                                      | -0.6, 13.1  |
| BMI $\geq 30$ kg/m <sup>2</sup> ( $n = 38$ ) | -0.2                                                          | -7.2, 6.9   | 1.8                                                                       | -9.4, 13.0 | 2.0                                                                      | -12.4, 16.4 |

(Table continues on next page)

|                                                           | Substituting<br>1 hour/day of sedentary<br>time with standing |             | Substituting<br>1 hour/day of sedentary<br>time with physical<br>activity |             | Substituting<br>1 hour/day of standing<br>time with physical<br>activity |             |
|-----------------------------------------------------------|---------------------------------------------------------------|-------------|---------------------------------------------------------------------------|-------------|--------------------------------------------------------------------------|-------------|
|                                                           | $\beta$                                                       | 95% CI      | $\beta$                                                                   | 95% CI      | $\beta$                                                                  | 95% CI      |
| Physical functioning                                      |                                                               |             |                                                                           |             |                                                                          |             |
| Total group ( $n = 136$ )                                 | 3.1                                                           | 0.5, 5.7    | 5.6                                                                       | 0.7, 10.6   | 2.6                                                                      | -3.9, 9.0   |
| BMI<30 kg/m <sup>2</sup> ( $n = 98$ )                     | 2.7                                                           | -0.3, 5.7   | 6.0                                                                       | -0.2, 12.2  | 3.3                                                                      | -4.7, 11.3  |
| BMI $\geq$ 30 kg/m <sup>2</sup> ( $n = 38$ )              | 4.0                                                           | -3.9, 11.8  | 7.4                                                                       | -7.0, 21.7  | 3.4                                                                      | -14.0, 20.8 |
| Role functioning                                          |                                                               |             |                                                                           |             |                                                                          |             |
| Total group ( $n = 136$ )                                 | 3.1                                                           | -0.4, 6.6   | 1.7                                                                       | -4.9, 8.3   | -1.4                                                                     | -9.9, 7.2   |
| BMI<30 kg/m <sup>2</sup> ( $n = 98$ )                     | 2.3                                                           | -1.5, 6.2   | 7.8                                                                       | -0.0, 15.7  | 5.5                                                                      | -4.7, 15.7  |
| BMI $\geq$ 30 kg/m <sup>2</sup> ( $n = 38$ )              | 1.6                                                           | -9.1, 12.2  | -9.3                                                                      | -24.2, 5.5  | -10.9                                                                    | -30.6, 8.8  |
| Social functioning                                        |                                                               |             |                                                                           |             |                                                                          |             |
| Total group ( $n = 136$ )                                 | 1.3                                                           | -1.4, 3.9   | 0.4                                                                       | -4.6, 5.4   | -0.8                                                                     | -7.3, 5.7   |
| BMI<30 kg/m <sup>2</sup> ( $n = 98$ )                     | 0.8                                                           | -2.4, 4.1   | 2.3                                                                       | -4.2, 8.8   | 1.5                                                                      | -6.9, 9.9   |
| BMI $\geq$ 30 kg/m <sup>2</sup> ( $n = 38$ )              | 2.9                                                           | -3.8, 9.5   | -2.3                                                                      | -12.9, 8.4  | -5.1                                                                     | -18.8, 8.6  |
| Disability                                                |                                                               |             |                                                                           |             |                                                                          |             |
| Total group ( $n = 132$ )                                 | -3.0                                                          | -4.9, -1.1  | -3.3                                                                      | -6.9, 0.3   | -0.4                                                                     | -5.0, 4.3   |
| BMI<30 kg/m <sup>2</sup> ( $n = 96$ )                     | -2.9                                                          | -5.1, -0.7  | -4.3                                                                      | -8.8, 0.2   | -1.4                                                                     | -7.3, 4.5   |
| BMI $\geq$ 30 kg/m <sup>2</sup> ( $n = 36$ )              | -1.9                                                          | -7.9, 4.1   | -3.7                                                                      | -11.9, 4.4  | -1.8                                                                     | -12.8, 9.2  |
| Fatigue                                                   |                                                               |             |                                                                           |             |                                                                          |             |
| Total group ( $n = 134$ )                                 | -4.0                                                          | -7.6, -0.3  | -3.6                                                                      | -10.5, 3.3  | 0.3                                                                      | -8.5, 9.2   |
| BMI<30 kg/m <sup>2</sup> ( $n = 96$ )                     | -3.2                                                          | -7.2, 0.8   | -7.9                                                                      | -15.8, 0.1  | -4.7                                                                     | -15.0, 5.6  |
| BMI $\geq$ 30 kg/m <sup>2</sup> ( $n = 38$ )              | -6.2                                                          | -18.3, 5.8  | -0.5                                                                      | -21.0, 20.0 | 5.7                                                                      | -19.0, 30.5 |
| Depression                                                |                                                               |             |                                                                           |             |                                                                          |             |
| Total group ( $n = 135$ )                                 | -0.1                                                          | -0.5, 0.4   | -0.5                                                                      | -1.4, 0.4   | -0.4                                                                     | -1.6, 0.7   |
| BMI<30 kg/m <sup>2</sup> ( $n = 97$ )                     | 0.2                                                           | -0.3, 0.7   | -1.5                                                                      | -2.4, -0.5  | -1.7                                                                     | -2.9, -0.5  |
| BMI $\geq$ 30 kg/m <sup>2</sup> ( $n = 38$ )              | -0.4                                                          | -2.1, 1.3   | 0.0                                                                       | -2.8, 2.9   | 0.4                                                                      | -3.0, 3.8   |
| Anxiety                                                   |                                                               |             |                                                                           |             |                                                                          |             |
| Total group ( $n = 135$ )                                 | 0.0                                                           | -0.5, 0.5   | -0.7                                                                      | -1.7, 0.3   | -0.7                                                                     | -2.0, 0.5   |
| BMI<30 kg/m <sup>2</sup> ( $n = 98$ )                     | 0.3                                                           | -0.3, 0.9   | -1.5                                                                      | -2.8, -0.3  | -1.8                                                                     | -3.4, -0.3  |
| BMI $\geq$ 30 kg/m <sup>2</sup> ( $n = 37$ )              | -0.5                                                          | -1.6, 0.5   | 0.7                                                                       | -0.9, 2.3   | 1.3                                                                      | -0.9, 3.5   |
| <u>Perceived deficiency in social support<sup>c</sup></u> |                                                               |             |                                                                           |             |                                                                          |             |
| Global quality of life                                    |                                                               |             |                                                                           |             |                                                                          |             |
| Total group ( $n = 136$ )                                 | 1.0                                                           | -1.6, 3.5   | 3.2                                                                       | -1.6, 7.9   | 2.2                                                                      | -3.9, 8.4   |
| No deficiency ( $n = 76$ )                                | -3.1                                                          | -7.1, 0.9   | 2.3                                                                       | -4.5, 9.1   | 5.4                                                                      | -3.7, 14.4  |
| Deficiency ( $n = 60$ )                                   | 4.1                                                           | 0.5, 7.8    | 3.7                                                                       | -4.5, 12.0  | -0.4                                                                     | -10.6, 9.8  |
| Physical functioning                                      |                                                               |             |                                                                           |             |                                                                          |             |
| Total group ( $n = 136$ )                                 | 3.1                                                           | 0.5, 5.7    | 5.6                                                                       | 0.7, 10.6   | 2.6                                                                      | -3.9, 9.0   |
| No deficiency ( $n = 76$ )                                | 2.0                                                           | -1.4, 5.5   | 4.5                                                                       | -1.3, 10.2  | 2.4                                                                      | -5.2, 10.0  |
| Deficiency ( $n = 60$ )                                   | 4.3                                                           | 0.2, 8.5    | 5.8                                                                       | -3.5, 15.0  | 1.4                                                                      | -10.0, 12.9 |
| Role functioning                                          |                                                               |             |                                                                           |             |                                                                          |             |
| Total group ( $n = 136$ )                                 | 3.1                                                           | -0.4, 6.6   | 1.7                                                                       | -4.9, 8.3   | -1.4                                                                     | -9.9, 7.2   |
| No deficiency ( $n = 76$ )                                | -0.9                                                          | -5.5, 3.8   | -2.4                                                                      | -10.2, 5.4  | -1.6                                                                     | -11.9, 8.8  |
| Deficiency ( $n = 60$ )                                   | 4.6                                                           | -0.8, 10.0  | 9.6                                                                       | -2.5, 21.7  | 5.0                                                                      | -10.0, 20.0 |
| Social functioning                                        |                                                               |             |                                                                           |             |                                                                          |             |
| Total group ( $n = 136$ )                                 | 1.3                                                           | -1.4, 3.9   | 0.4                                                                       | -4.6, 5.4   | -0.8                                                                     | -7.3, 5.7   |
| No deficiency ( $n = 76$ )                                | -0.0                                                          | -3.7, 3.6   | 0.6                                                                       | -5.5, 6.8   | 0.7                                                                      | -7.5, 8.8   |
| Deficiency ( $n = 60$ )                                   | 2.0                                                           | -2.7, 6.6   | 0.0                                                                       | -10.6, 10.6 | -1.9                                                                     | -15.0, 11.1 |
| Disability                                                |                                                               |             |                                                                           |             |                                                                          |             |
| Total group ( $n = 132$ )                                 | -3.0                                                          | -4.9, -1.1  | -3.3                                                                      | -6.9, 0.3   | -0.4                                                                     | -5.0, 4.3   |
| No deficiency ( $n = 76$ )                                | -0.7                                                          | -3.1, 1.8   | -3.1                                                                      | -7.2, 1.0   | -2.4                                                                     | -7.9, 3.0   |
| Deficiency ( $n = 56$ )                                   | -4.2                                                          | -7.1, -1.3  | -5.0                                                                      | -11.6, 1.7  | -0.8                                                                     | -9.0, 7.5   |
| Fatigue                                                   |                                                               |             |                                                                           |             |                                                                          |             |
| Total group ( $n = 134$ )                                 | -4.0                                                          | -7.6, -0.3  | -3.6                                                                      | -10.5, 3.3  | 0.3                                                                      | -8.5, 9.2   |
| No deficiency ( $n = 76$ )                                | -1.0                                                          | -6.8, 4.7   | -3.5                                                                      | -13.3, 6.3  | -2.5                                                                     | -15.4, 10.5 |
| Deficiency ( $n = 58$ )                                   | -8.2                                                          | -13.4, -3.0 | -1.2                                                                      | -11.9, 9.5  | 7.0                                                                      | -6.4, 20.4  |

(Table continues on next page)

|                            | Substituting<br>1 hour/day of sedentary<br>time with standing |           | Substituting<br>1 hour/day of sedentary<br>time with physical<br>activity |           | Substituting<br>1 hour/day of standing<br>time with physical<br>activity |            |
|----------------------------|---------------------------------------------------------------|-----------|---------------------------------------------------------------------------|-----------|--------------------------------------------------------------------------|------------|
|                            | $\beta$                                                       | 95% CI    | $\beta$                                                                   | 95% CI    | $\beta$                                                                  | 95% CI     |
| Depression                 |                                                               |           |                                                                           |           |                                                                          |            |
| Total group ( $n = 135$ )  | -0.1                                                          | -0.5, 0.4 | -0.5                                                                      | -1.4, 0.4 | -0.4                                                                     | -1.6, 0.7  |
| No deficiency ( $n = 75$ ) | 0.3                                                           | -0.3, 1.0 | -0.6                                                                      | -1.7, 0.6 | -0.9                                                                     | -2.3, 0.6  |
| Deficiency ( $n = 60$ )    | -0.4                                                          | -1.2, 0.4 | 0.1                                                                       | -1.6, 1.8 | 0.5                                                                      | -1.6, 2.6  |
| Anxiety                    |                                                               |           |                                                                           |           |                                                                          |            |
| Total group ( $n = 135$ )  | 0.0                                                           | -0.5, 0.5 | -0.7                                                                      | -1.7, 0.3 | -0.7                                                                     | -2.0, 0.5  |
| No deficiency ( $n = 76$ ) | 0.5                                                           | -0.2, 1.2 | -1.1                                                                      | -2.2, 0.1 | -1.5                                                                     | -3.1, -0.0 |
| Deficiency ( $n = 59$ )    | -0.3                                                          | -1.1, 0.5 | -0.4                                                                      | -2.4, 1.5 | -0.1                                                                     | -2.5, 2.3  |

Abbreviations:  $\beta$ , unstandardized regression coefficient (representing the difference in mean health-related quality of life score per substitution of 1 hour/day of sedentary or standing time with standing or physical activity, while keeping total time constant); CI, confidence interval.

<sup>a</sup>Scales are 0-100 (global quality of life, physical, role and social functioning, and disability), 20-140 (fatigue), and 0-21 (depression and anxiety), with higher scores indicating higher global quality of life, physical, role and social functioning, disability, fatigue, depression and anxiety.

<sup>b</sup>All activity categories except for the category to be substituted (i.e., sedentary or standing time), and total waking wear time were entered in a single model, to estimate associations of substituting 1 hour/day of sedentary or standing time (the excluded variable) with standing or physical activity, while keeping total time constant. Models were adjusted for age (years), gender, number of comorbidities (0/1/ $\geq 2$ ), smoking status (current/previous or never), time since diagnosis (years), cancer stage (I/II/III), body mass index ( $\text{kg/m}^2$ ), perceived deficiency in social support score (continuous), chemotherapy received (yes/no; only models with physical functioning, fatigue and depression as outcome), stoma (yes/no; only models with physical and role functioning, disability and anxiety as outcome), tumor subsite (colon/rectum, with rectosigmoid classified as rectum; only models with physical and role functioning, and disability as outcome), education level (low/medium/high; only models with fatigue and depression as outcome), having a partner (yes/no; only models with anxiety as outcome).

<sup>c</sup>Dichotomized based on 6-item Social Support List score (scale: 6-18, with higher score indicating higher deficiency); categorized into no deficiency (score=6) vs deficiency (score>6).
